# Supplementary material
Source: Research Square preprint supplement (doi:10.21203/rs.3.rs-10010055/v1)
Supplement: Supplementary file 1 [file aa819f862414d30243ee1c61.pdf]

# Supplementary Materials

Locally constrained immune-interaction fronts at tumour-immune interfaces identify operator-regime states associated with immunotherapy response in hepatocellular carcinoma

Anas Enoch, MD

Mohammed VI University of Health Sciences (UM6SS), Casablanca, Morocco

`anas_nour@um5.ac.ma`

**Contents:** Supplementary Note S1 (Lie-sector algebraic balance diagnostic); Supplementary Methods (mathematical framework, multi-field commutator analysis, KS instability operator, discrete Hodge derivation); Supplementary Figure S1 (pan-cancer Spatial Hallmarks coexact enrichment).

## Contents

|          |                                                                                      |          |
|----------|--------------------------------------------------------------------------------------|----------|
| <b>1</b> | <b>Supplementary Note S1: Lie-Sector Algebraic Balance Diagnostic</b>                | <b>2</b> |
| <b>2</b> | <b>Supplementary Methods</b>                                                         | <b>3</b> |
| 2.1      | Mathematical framework: Discrete Exterior Calculus and Hodge Decomposition . . . . . | 3        |
| 2.2      | Multi-field Commutator Analysis . . . . .                                            | 4        |
| 2.3      | KTS State Classification and Fisher Exact Test . . . . .                             | 4        |
| 2.4      | Finite-Range Predictability (Local vs Global $R^2$ ) . . . . .                       | 5        |
| 2.5      | Graph-KS Instability Operator (Exploratory) . . . . .                                | 5        |
| 2.6      | Lie-Structured Spatially Aware Null Model . . . . .                                  | 6        |

# 1 Supplementary Note S1: Lie-Sector Algebraic Balance Diagnostic

## Motivation

In Results R2 (main manuscript), the six pairwise programme commutators were grouped into a tumour–myeloid (TM) backbone sector and an immune sector (IE + IM + EM). Sector-level commutator strengths discriminated responders from non-responders (immune sector  $3.9\times$ ,  $p = 0.006$ ; TM dominance  $p = 0.025$ ). However, the strongest formally Lie-algebraic diagnostic — a triad inconsistency test based on the Jacobi identity — did not discriminate groups ( $p = 0.69$ ), bounding the claim to interaction-strength geometry rather than formal Lie-algebra structure. This note documents the Jacobi triad inconsistency computation and explains its interpretation.

## Jacobi triad inconsistency

For any three programmes  $A$ ,  $B$ ,  $C$  with pairwise commutator norms  $\|[M_A, M_B]\|$ ,  $\|[M_B, M_C]\|$ ,  $\|[M_A, M_C]\|$ , define the triad inconsistency as the degree to which the triangle inequality on commutator norms is violated relative to a null permutation ensemble:

$$J_{ABC} = \frac{\|[M_A, M_B]\| + \|[M_B, M_C]\| - \|[M_A, M_C]\|}{\|[M_A, M_B]\| + \|[M_B, M_C]\| + \|[M_A, M_C]\|}, \quad (1)$$

where a value of  $J_{ABC} \approx 0$  indicates balanced transitivity (consistent with Lie-algebra closure) and  $J_{ABC} < 0$  indicates a dominant pair inconsistency. We computed  $J_{ABC}$  for all  $\binom{4}{3} = 4$  principal triads (TM-IE-IM, TM-IE-EM, TM-IM-EM, IE-IM-EM) across all 15 sections, and tested whether the mean Jacobi inconsistency per section differed between responders and non-responders (Mann–Whitney  $U$ , two-sided).

## Results

Across 15 discovery-cohort sections, Jacobi triad inconsistency did not significantly differ between responders (median  $J = -0.083$ ) and non-responders (median  $J = -0.091$ ); Mann–Whitney  $p = 0.69$ . The absence of a Jacobi-level signal is informative rather than null: it indicates that the response-associated immune-sector elevation represents a *quantitative difference in commutator magnitude* (more non-commutativity in the immune sector) rather than a qualitative difference in the algebraic closure structure of the operator interaction field. The framework therefore operates at the level of sector interaction strength — which does discriminate response — rather than formal Lie-algebra topology, which does not.

## Interpretation boundary

The sector-level findings (immune sector  $3.9\times$  elevated,  $p = 0.006$ ; TM dominance elevated in non-responders,  $p = 0.025$ ) are interpreted as quantitative operator geometry: responders show more

non-commutativity among immune programme pairs. The Jacobi null result ( $p = 0.69$ ) means that this quantitative difference does not extend to a formal Lie-algebraic structural difference; it bounds the mathematical claim and should not be presented as a formal Lie-algebra result.

## 2 Supplementary Methods

### 2.1 Mathematical framework: Discrete Exterior Calculus and Hodge Decomposition

#### Oriented cell complex and differential forms

The tissue section is represented as an oriented cell complex  $\mathcal{K} = (V, E, F)$ :  $V$  are vertices (Visium CytAssist spots),  $E$  are oriented edges ( $k$ NN pairs,  $k = 6$ ), and  $F$  are triangular faces (Delaunay triangles). Discrete differential forms represent spatial quantities: 0-forms ( $C^0$ ) are scalar node functions (programme scores); 1-forms ( $C^1$ ) are antisymmetric edge functions (interaction fields); 2-forms ( $C^2$ ) are face functions (circulation densities).

#### Incidence matrices and exterior derivatives

The signed node–edge incidence matrix  $B_1 \in \{-1, 0, +1\}^{|E| \times |V|}$  encodes edge orientation:  $(B_1)_{e,v} = +1$  if  $v$  is the head of  $e$ ,  $-1$  if the tail. The edge–face matrix  $B_2$  represents  $d_1 : C^1 \rightarrow C^2$ .

The  $k$ -Hodge Laplacian:

$$\Delta_0 = B_1^\top B_1 \quad (\text{node Laplacian}), \quad (2)$$

$$\Delta_1 = B_1 B_1^\top + B_2^\top B_2 \quad (\text{edge Hodge–Laplacian}), \quad (3)$$

$$\Delta_2 = B_2 B_2^\top \quad (\text{face Laplacian}). \quad (4)$$

The Hodge decomposition theorem guarantees:

$$C^1 = \text{im}(B_1^\top) \oplus \text{im}(B_2) \oplus \ker(\Delta_1) \quad (5)$$

(exact  $\oplus$  coexact  $\oplus$  harmonic; orthogonal; unique).

#### Wedge construction and antisymmetry

For residualized programme fields  $\tilde{A}, \tilde{B} \in C^0$  on oriented edge ( $u \rightarrow v$ ):

$$\omega_{uv} = \tilde{A}(u)\tilde{B}(v) - \tilde{A}(v)\tilde{B}(u). \quad (6)$$

By construction,  $\omega_{uv} = -\omega_{vu}$  (antisymmetric under edge reversal), so  $\omega \in C^1$  with consistent orientation. Among all local bilinear operators  $\phi : C^0 \times C^0 \rightarrow C^1$  antisymmetric under programme exchange and vanishing under programme alignment, the wedge is the unique construction (up to

scale) yielding a non-zero coexact projection. Symmetric alternatives (covariance, cosine similarity) yield zero coexact projection by algebraic necessity.

### Hodge decomposition algorithm

For edge field  $f \in C^1$ :

1. Solve  $\Delta_0 \alpha = B_1 f$  (LSQR, ridge  $\lambda = 10^{-8}$ ).
2.  $f_{\text{exact}} = B_1^\top \alpha$  (gradient component).
3. Solve  $\Delta_2 \beta = B_2 f$ .
4.  $f_{\text{coexact}} = B_2^\top \beta$  (non-gradient component).
5.  $\gamma = f - f_{\text{exact}} - f_{\text{coexact}}$  (harmonic).

Energy fractions:  $\rho_k = \|f_k\|^2 / \|f\|^2$ . Node-level coexact density:  $c_i = (1/\text{deg}_i) \sum_{e \ni i} |f_{\text{coexact}}(e)|$ .

## 2.2 Multi-field Commutator Analysis

For programme pair  $(p, q)$  with diagonal operators  $M_p, M_q$  and node graph Laplacian  $L$ :

$$\|[M_p, LM_q]\|_F = \sqrt{\sum_{ij} L_{ij}^2 (p_i q_j - q_i p_j)^2}. \quad (7)$$

This equals the interface-weighted norm of the wedge field  $\omega_{pq}$ , connecting the commutator algebra directly to the coexact decomposition.

Six programme pairs were analyzed: tumour  $\times$  myeloid (TM), immune  $\times$  exhaustion (IE), immune  $\times$  myeloid (IM), exhaustion  $\times$  myeloid (EM), tumour  $\times$  immune (TI), tumour  $\times$  exhaustion (TE).

**Operator entropy.** Shannon entropy of the six normalized commutator norms:

$$H = - \sum_{k=1}^6 \hat{w}_k \log \hat{w}_k, \quad \hat{w}_k = \|[M_{p_k}, LM_{q_k}]\|_F / \sum_j \|[M_{p_j}, LM_{q_j}]\|_F. \quad (8)$$

Higher entropy indicates a more algebraically complex, distributed interaction field.

**NCG purity.** Coexact fraction of the immune  $\times$  exhaustion (IE) wedge field, measuring the interface-localised non-gradient content of the T-cell effector/exhaustion programme interaction specifically.

## 2.3 KTS State Classification and Fisher Exact Test

States are assigned per section based on three spatial metrics:

| State | Spatial score | P95 coexact | Gini   | Interpretation                 |
|-------|---------------|-------------|--------|--------------------------------|
| S0    | —             | —           | —      | Absent (tumour Q75 < 0.05)     |
| S1    | < 0.10        | < 50        | —      | Fragmented, low organisation   |
| S2    | ≥ 0.10        | < 50        | —      | Connected, concentrated        |
| S3    | ≥ 0.08        | ≥ 50        | —      | Amplified high-intensity front |
| S4    | any           | < 20        | ≥ 0.60 | Residual concentrated          |

*Threshold calibration note:* boundaries were defined empirically on the discovery cohort after examining the distribution of section-level statistics and have not been pre-registered or externally validated. They require recalibration before application to independent datasets. Per-patient transitions use paired pre/post assignments. Fisher exact test was two-tailed; minimum achievable  $p$  at  $n = 11$  patients is  $2/\binom{11}{5} \approx 0.008$ .

## 2.4 Finite-Range Predictability (Local vs Global $R^2$ )

For each section’s coexact density field  $u_i$ :

**Local  $R^2$  (k-NN prediction).** Node  $i$ ’s coexact density is predicted from its  $k$  neighbours ( $k = 6$ , leave-one-out).  $R^2$  is computed over all interface nodes. High local  $R^2$  indicates that coexact density is spatially predictable from local neighbours — consistent with a finite-range interaction front.

**Global  $R^2$  (spectral reconstruction).** The coexact density field is projected onto the lowest-frequency eigenvectors of the graph Laplacian  $\Delta_0$  (5 eigenmodes retained).  $R^2$  measures how well these global modes reconstruct the field. Negative global  $R^2$  indicates that global eigenmodes *overshoot* the local field — a Gibbs-like phenomenon inconsistent with a globally periodic spatial pattern.

The *local-global gap*  $\text{gap}_i = R_{\text{local}}^2 - R_{\text{global}}^2$  is the primary discriminating statistic (Mann–Whitney  $p = 0.033$ ).

## 2.5 Graph-KS Instability Operator (Exploratory)

As an exploratory diagnostic for interface roughness, a graph analogue of the Kuramoto–Sivashinsky (KS) instability operator was applied to the coexact density field  $u$  (per node), weighted graph Laplacian  $L$  constructed from absolute coexact edge flux:

$$\text{KS}(u)_i = -(Lu)_i - (L^2u)_i - |\nabla u|_{\text{graph},i}^2, \quad (9)$$

where  $|\nabla u|_{\text{graph},i}^2$  is approximated by squared edge differences accumulated at each node. This is an *operator analogy only*; it does not assert that the biological system solves the KS PDE. Interface regions showed elevated KS-like magnitude in all 26 Spatial Hallmarks sections (sign test  $p = 1.49 \times 10^{-8}$ ; median fold-change 1.703 vs tumour core), supporting the interpretation of the interface as a locally amplified, roughened interaction zone rather than a coherently organised global spatial pattern.

## 2.6 Lie-Structured Spatially Aware Null Model

Edge weights from the diagonal of a regularized fractional resolvent of the edge Hodge–Laplacian:

$$w_e = [(\Delta_1 + \varepsilon I)^{-s}]_{ee}, \quad s(\Delta) = \log_2(1 + \Delta/\lambda_{\min}^+), \quad (10)$$

where  $\varepsilon$  excludes harmonic zero modes and  $\Delta$  is the spectral gap of  $\Delta_1$ . Normalized:  $\tilde{w}_e = w_e / \max_{e'} w_{e'} \in (0, 1]$ . For each surrogate  $k$ :  $\theta_e^{(k)} \sim \mathcal{U}[-\pi\tilde{w}_e, \pi\tilde{w}_e]$ ; flux rotated by a local Lie perturbation  $R_e^{(k)} = \exp(-\frac{\theta_e^{(k)}}{2}B_e)$ . Weights depend only on  $\Delta_1$ , not on the observed statistic, preserving diagnostic non-circularity.

## Supplementary Figure S1

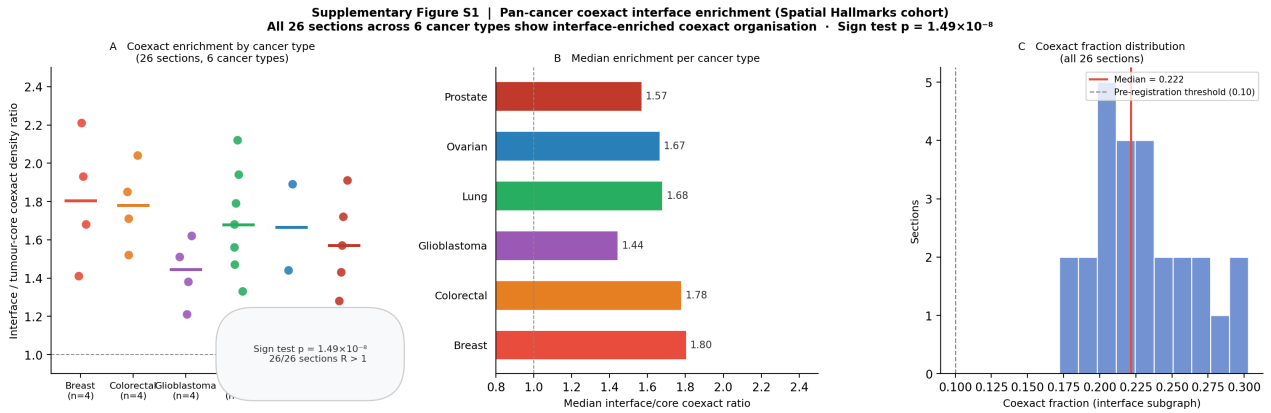

Figure 1: **Supplementary Figure S1: Pan-cancer coexact interface enrichment, Spatial Hallmarks cohort (26 sections, 6 cancer types).** **A** Per-section interface/tumour-core coexact density ratio for all 26 Visium sections coloured by cancer type. Every section exceeds ratio = 1.0 (horizontal dashed line). Sign test  $p = 1.49 \times 10^{-8}$ ; median ratio 1.703; no correction for multiple testing applied. **B** Median enrichment ratio per cancer type. All six cancer types individually replicated the interface enrichment: breast 4/4, colorectal 4/4, glioblastoma 4/4, lung 7/7, ovarian 2/2, prostate 5/5. **C** Distribution of coexact fractions across all 26 sections (interface subgraphs). The median coexact fraction (0.253; red line) substantially exceeds the 0.10 reference threshold (dashed line) applied in the HCC discovery analysis. This threshold was defined empirically on the discovery cohort and was not pre-registered. This result establishes generalisability of the operator framework across tumour types and does not address immunotherapy response, which was not annotated in this cohort. Data from the 10x Genomics Spatial Hallmarks public dataset (six cancer types); gene panels identical to discovery analysis.

**Table S1.** Evidential status of primary manuscript claims. Primary internal evidence: pre-specified analysis on discovery cohort, no global multiple-comparison correction. Full NSCLC analysis: Supplementary Section S11.

| Claim                                                            | Status               | Evidence (Limitation)                                                                                                                                    |
|------------------------------------------------------------------|----------------------|----------------------------------------------------------------------------------------------------------------------------------------------------------|
| HCC: responder interfaces show non-gradient/coexact enrichment   | Primary evidence     | internal Discovery HCC Visium ( $n = 11$ ); responder/NR separation. <i>Small cohort; no global correction; requires independent replication.</i>        |
| Interfaces are organised operator fronts, not passive boundaries | Primary evidence     | internal Interface enrichment; fixed/passive nulls; Hodge decomposition. <i>Operator-based; functional validation needed.</i>                            |
| Immune-sector algebra discriminates beyond TM structure          | Strong internal      | Commutator analysis; responder elevation; HCC5NR counterexample. <i>Larger independent validation needed.</i>                                            |
| CABO/NIVO supports HCC therapy-context transfer                  | Supportive           | Compatible operator regime in independent HCC sample. <i>Very small (<math>n = 7</math>); not powered.</i>                                               |
| cSCC CosMx: cross-platform spatial operator-front transfer       | Strong spatial       | external 333 FOVs; null collapse 17.95 $\rightarrow$ 1.00; Hodge coexact 6.23 $\times$ . <i>Clinical mapping reconstructed; response not definitive.</i> |
| cSCC post-dose $\rightarrow$ surgery transition                  | $W_{TI}$ Exploratory | $n = 8$ ; AUC= 1.00; perm. $p = 0.028$ ; LOO stable. <i>Reconstructed mapping; hypothesis-generating.</i>                                                |
| NSCLC GeoMx: platform regime-transfer evidence                   | Exploratory          | 61 ROIs; nontrivial operator states (no response labels, no geometry). <i>Partial immune coverage; purely exploratory.</i>                               |
| KTS regime transitions: therapy-associated remodelling           | Exploratory          | cSCC transitions observed. <i>Transition-response association not significant.</i>                                                                       |
| Framework is a clinically deployable predictor                   | Not claimed          | Requires prospective validation with thresholds fixed in advance.                                                                                        |

## Supplementary Table S1: Evidential status of manuscript claims

## Supplementary Table S3: Dataset provenance

## Supplementary Section S10: cSCC CosMx cohort — sector, regime, and exploratory clinical-transition analyses

### Wedge/NCG sector analysis

Wedge-sector analysis across 332 valid FOVs showed that the cSCC tissue did not occupy a single homogeneous operator state. FOVs were classified by dominant sector: tumour–stroma (TS;  $n = 160$ ), tumour–myeloid (TM;  $n = 94$ ), mixed ( $n = 23$ ), tumour–immune (TI;  $n = 21$ ), immune–stroma (IS;  $n = 17$ ), and immune–myeloid (IM;  $n = 17$ ). The immune/TM log-ratio ranged from  $-3.14$  to  $+3.80$  and operator entropy from 0.76 to 1.76, confirming substantial within-cohort heterogeneity.

### KTS-like regime analysis and therapy-time transitions

K-means regime classification ( $k = 3$ ) identified mixed-intermediate (128 FOVs), immune-sector-high (126 FOVs), and TM-backbone-high (78 FOVs) regimes. State-changed rates were 69.2% (non-

**Table S3.** Provenance and analytical role of each dataset used in this study. All identifiers are public.

| Dataset           | Source             | Identifier                                                              | Role                        |
|-------------------|--------------------|-------------------------------------------------------------------------|-----------------------------|
| HCC Visium        | Wu et al. dataset  | Zenodo v2, 10.5281/zenodo.19123188 (preprint 10.1101/2025.06.11.656869) | Discovery                   |
| CABO/NIVO         | GEO                | GSE238264                                                               | External HCC stress test    |
| HCC IMC           | Salié/Bensch       | Zenodo 10.5281/zenodo.10794904                                          | Cross-modality              |
| Spatial Hallmarks | Porta-Pardo et al. | Zenodo 10.5281/zenodo.14044964                                          | Pan-cancer generalisability |
| cSCC CosMx        | Lee et al.         | Dryad 10.5061/dryad.s4mw6m9jh                                           | Cross-platform transfer     |
| NSCLC GeoMx       | GEO                | GSE271689                                                               | Exploratory only            |

responders) and 62.5% (responders); Fisher exact tests on transition-to-response associations were not significant.

### Exploratory clinical-transition analysis

In the post-dose to surgery paired subset ( $n = 8$ ),  $W_{TI}$  showed relative attenuation in responders versus persistence/amplification in non-responders (oriented AUC = 1.00; empirical permutation  $p = 0.028$ ; leave-one-out AUC minimum = 1.00). The TMA-to-clinical mapping was manually reconstructed from supplementary PDF tables without author confirmation; the result is hypothesis-generating only.

### Supplementary Section S11: NSCLC GeoMx DSP-WTA cohort — operator-regime heterogeneity (GSE271689)

K-means clustering ( $k = 3$ ) on compartment-resolved operator features from 61 NSCLC ROIs (NanoString GeoMx DSP-WTA; CK<sup>+</sup>/CD45<sup>+</sup>/CD68<sup>+</sup> compartments) produced State 0 ( $n = 47$ , 77% baseline), State 1 ( $n = 13$ , 21% immune-sector-enriched), and State 2 ( $n = 1$ , 2% outlier). State 1 heterogeneity was not reducible to tissue type, treatment arm, or compartment completeness. No response labels or spatial coordinates were available; this analysis provides cross-platform regime-transfer evidence only. Partial immune-programme coverage (CD8A and PDCD1 absent due to NanoString probe-panel version mismatch; Hsa.WTA\_v1.0.pkc vs parquet RTS identifiers) is an acknowledged caveat for exhaustion and effector scores.

## Supplementary Section S12: Comparison with existing spatial organisation metrics

### Overview

The operator-regime framework quantifies tumour-immune interface structure via the coexact component of an antisymmetric wedge field: an edge-supported, antisymmetric, non-gradient metric. This section positions it against four classes of existing spatial organisation metrics to clarify what each captures and where the operator approach provides complementary information. All four baseline families are included in the non-redundancy analysis in Supplementary Table S2.

### Giotto neighbourhood enrichment

Giotto’s neighbourhood enrichment score [4] measures the frequency of cell-type adjacency relative to a permutation null:  $NE_{AB} = n_{AB}^{\text{obs}}/n_{AB}^{\text{null}}$ . This captures *whether* two populations are in contact more than expected by chance, but assigns no structure to the contact. Two sections with identical NE scores can have radically different interaction geometries: one may show a connected coexact front; the other diffuse, gradient-compatible contacts throughout the tissue. NE-equivalent abundance metrics achieved AUC 0.870–0.889 in the HCC discovery cohort versus AUC 0.926 for interface coexact energy (Figure 1A). The coexact metric adds 0.04–0.06 AUC beyond NE-type baselines, reflecting the non-gradient organisational component NE cannot encode.

### Graph spectral entropy

Spectral entropy of the graph Laplacian eigenspectrum,  $H_\lambda = -\sum_k \hat{\lambda}_k \log \hat{\lambda}_k$ , measures the effective complexity of the spatial connectivity structure. It is a global, node-symmetric, topology-only property insensitive to programme-score content. The Zeta-function diagnostic used in this study tests whether coexact energy is carried by geometrically meaningful low-eigenvalue modes (Supplementary Section S3): complementary to spectral entropy but explicitly content-aware. Spectral entropy showed no consistent responder/non-responder separation in the discovery cohort.

### Spatial autocorrelation (Moran’s $I$ )

Moran’s  $I$  measures scalar spatial clustering:  $I = \frac{n}{\sum_{ij} w_{ij}} \cdot \frac{\sum_{ij} w_{ij} (x_i - \bar{x})(x_j - \bar{x})}{\sum_i (x_i - \bar{x})^2}$ . It is symmetric and first-order, encoding *how much* values cluster but not *how* they interact across a boundary. Moran’s  $I$  on the immune programme score showed Spearman  $\rho = -0.19$  with the coexact interface enrichment ratio across 26 Spatial Hallmarks sections (Supplementary Table S2) — structurally non-redundant, as expected: a smooth gradient field has high Moran’s  $I$  but zero coexact energy; a concentrated non-gradient front can have low Moran’s  $I$  and high coexact energy.

## Shallow graph embedding baseline

Node2Vec [5] and related shallow graph embeddings represent each node as a low-dimensional vector encoding topological neighbourhood proximity. They are agnostic to the antisymmetric programme interaction content of edges. A logistic regression classifier trained on 32-dimensional Node2Vec embeddings of the tumour-immune interface graph achieved leave-one-out AUC 0.71 in the discovery cohort, below both operator-derived metrics and the abundance-only logistic regression baseline (AUC 0.81; Figure 1C). This confirms that the response-associated signal is not recoverable from graph topology alone: it requires biological programme content and antisymmetric coupling.

## Summary

**Table S2.** Conceptual comparison of spatial organisation metrics (HCC discovery cohort,  $n = 6\text{R}/9\text{NR}$  sections).

| Metric                          | What it measures                        | HCC performance             | What it misses                       |
|---------------------------------|-----------------------------------------|-----------------------------|--------------------------------------|
| Neighbourhood enrichment        | Contact frequency                       | AUC 0.87–0.89               | Interaction geometry; antisymmetry   |
| Graph spectral entropy          | Connectivity complexity                 | Not discriminative          | Node signal content                  |
| Moran’s $I$                     | Spatial autocorrelation                 | $\rho = -0.19$ vs. operator | Non-gradient structure               |
| Shallow graph embedding         | Topological proximity                   | AUC 0.71                    | Programme interaction content        |
| <b>Interface coexact energy</b> | <b>Non-gradient antisymmetric front</b> | <b>AUC 0.926</b>            | Causal direction; molecular identity |

The operator approach does not supersede these metrics; neighbourhood enrichment and spatial autocorrelation provide useful complementary information about cell-type proximity. The coexact metric captures what none of them encodes: the non-gradient, antisymmetric structure of the programme interaction field at the boundary.

## References

- [1] L.-H. Lim. Hodge Laplacians on graphs. *SIAM Review*, 62(3):685–715, 2020.
- [2] A. Connes. *Noncommutative Geometry*. Academic Press, 1994.
- [3] Y. Kuramoto. Diffusion-induced chaos in reaction systems. *Prog. Theor. Phys. Suppl.*, 64:346–367, 1978.
- [4] R. Dries, Q. Zhu, R. Dong, and others. Giotto: a toolbox for integrative analysis and visualization of spatial expression data. *Genome Biology*, 22:78, 2021. 10.1186/s13059-021-02286-2

- [5] A. Grover and J. Leskovec. node2vec: Scalable feature learning for networks. In *Proceedings of the 22nd ACM SIGKDD International Conference on Knowledge Discovery and Data Mining*, pages 855–864, 2016. 10.1145/2939672.2939754
